# Supplementary material for: Pressure-assisted electrode fabrication using simply synthesized Cu3Sn alloy nanoparticles
Source: Royal Society of Chemistry journal article supplement (doi:10.1039/c5tc00215j), 2015-01-01
Supplement: c5tc00215j1.pdf [file c5tc00215j1.pdf]

Electronic Supplementary Information (ESI) for Journal of Materials Chemistry C

This journal is (c) The Royal Society of Chemistry 2014

## Pressure-assisted electrode fabrication using simply synthesized $\text{Cu}_3\text{Sn}$ alloy nanoparticles

Sanghun Cho<sup>a</sup>, Keon-Hee Lim<sup>a</sup>, Si Yun Park<sup>a</sup>, Zhenxing Yin<sup>a</sup>, Jeeyoung Yoo<sup>a\*</sup> and Youn Sang Kim<sup>a,b\*</sup>

<sup>a</sup> Program in Nano Science and Technology, Graduate School of Convergence Science and Technology, Seoul National University, Seoul, 151-744, Republic of Korea. E-mail: [younskim@snu.ac.kr](mailto:younskim@snu.ac.kr)

<sup>b</sup> Advanced Institutes of Convergence Technology, Iui-dong 864-1, Yeongtong-gu, Suwon-si, Gyeonggi-do 443-270, Republic of Korea

### Experimental Section

*Synthesis:* Copper(II) acetylacetonate ( $\text{Cu}(\text{acac})_2$ , Aldrich, 0.1 g) and Tin(II) acetylacetonate ( $\text{Sn}(\text{acac})_2$ , Aldrich, 0.028g) dissolved in 10 mL of Oleylamine (Aldrich, 70%) and 1mL Oleic acid (Aldrich, 90%) mixed solution was heated to 120 °C for 30minutes under vacuum conditions. The solution was then heated under nitrogen gas to a temperature of 310 °C with stirring. When the solution reached the temperature of 310 °C, the solution was left to react for 1 hour. The solution was then cooled to room temperature. Finally, the reacted solution was mixed with ethanol and hexane, and then the synthesized nanoparticles were conducted to centrifugation. The precipitates were washed with ethanol and hexane several times. The precipitated nanoparticles were dried in a vacuum oven (40 °C)

*Preparation of Conductive Electrodes:* The circle punched shielding layer (3M tape) of 5mm diameter attached on the PET substrates. The nanoparticle powder was loaded in the hole of shielding layer (powder mass : 0.03g) and covered the upper PET layer. Loading powder was applied to the setting pressure using a hydraulic pump press machine. The experiments were continued for 3 minutes at room temperature. The pressed sample was separated into an upper PET layer, a shielding layer on PET substrates and sample. We repeated the same process for fabricate a complex shape of conductive electrode. Then, the 3M tape, as an adhesive layer, attach the each sample such as round, line and complex shapes.

*Resistivity measurements:* Resistivity measurements of the sample were carried out in a four-point DC resistivity measurement setup. To make a four-point measurement base electrode tool, the patterned silver electrodes were evaporated on the PET or the glass substrate. The pattern had four electrodes with silver line thickness of 0.8 mm and a space distance of

0.6mm. The silver pattern was loaded using thermal evaporation. The pressed  $\text{Cu}_3\text{Sn}$  layer samples of diameter of 5mm were mounted onto a silver patterned PET substrate. And then 1kg weight was laid on the samples for uniform contact. A constant current of 10mA was applied using a Keithley 224 current source and voltage was measured for each experimental condition. In addition, the line patterned sample was measured to semiconductor parameter analyzer (Agilent 4155B) for the current-voltage characteristics.

*Instrumentation and Measurements:* HR-TEM images were captured using a JEOL JEM-3010 with an accelerating voltage of 100kV. The HAADF-STEM, EELS analysis and EDS mapping images were obtained using a JEOL JEM 2100F. To make a the cross-sectional TEM sample, we used a Focused Ion Beam (FIB) by NOVA 600 Nanolab(FEI). And then, the pressed sample was coated with a platinum-sputtering in order to protect the sample. The Pt coated cross-sectional TEM sample was loaded onto molybden TEM grid and conducted the TEM analysis. The XRD measurements were performed on the Bruker D8 DISCOVER diffractometer using a  $\text{Cu K}\alpha$  radiation source.

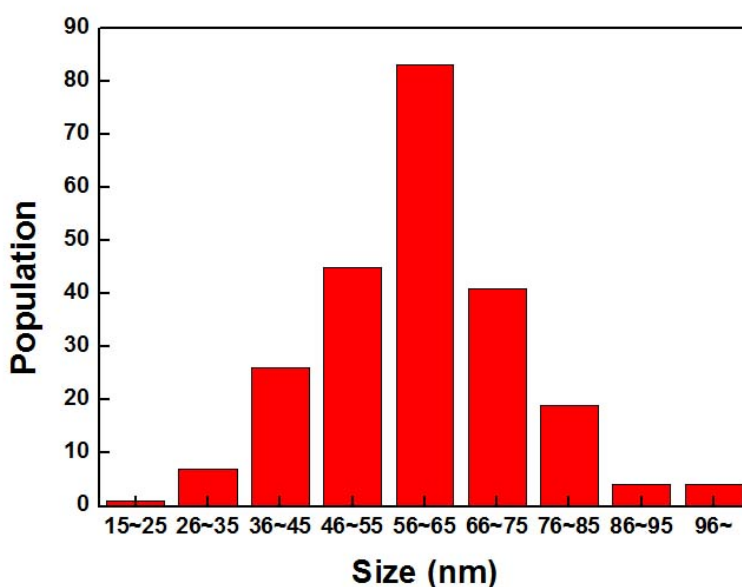

**Fig. S1.** Size distribution of synthesized  $\text{Cu}_3\text{Sn}$  alloy nanoparticles

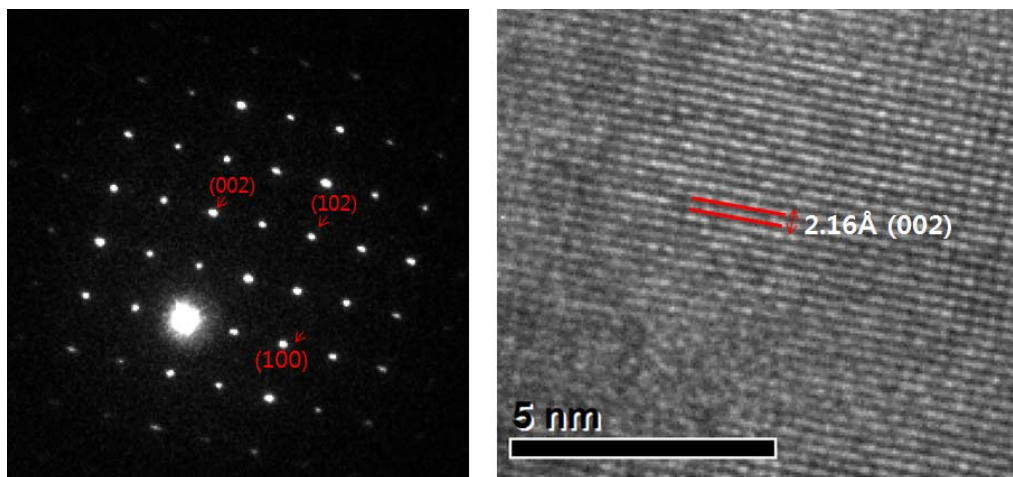

**Fig. S2.** Crystal characterization of the  $\text{Cu}_3\text{Sn}$  alloy nanoparticles. The left image shows the specific area electron diffraction (SAED) pattern of  $\text{Cu}_3\text{Sn}$  alloy nanoparticle. The right image shows the lattice parameter analysis. The lattice spacing is determined to be 0.21 nm, which corresponds to the (002) lattice spacing, in agreement with  $\text{Cu}_3\text{Sn}$  alloy nanoparticle crystal structures.

**Table S1.** Atomic ratio of individual  $\text{Cu}_3\text{Sn}$  alloy nanoparticles by TEM-EDS elemental analysis

| Number  | Atomic ratio (%) |       |
|---------|------------------|-------|
|         | Cu               | Sn    |
| 1       | 75.33            | 24.66 |
| 2       | 76.67            | 23.33 |
| 3       | 77.13            | 22.87 |
| 4       | 75.73            | 24.26 |
| 5       | 73.6             | 26.4  |
| 6       | 72.2             | 27.8  |
| 7       | 72.9             | 27.1  |
| 8       | 77.88            | 22.20 |
| Average | 75.18            | 24.82 |

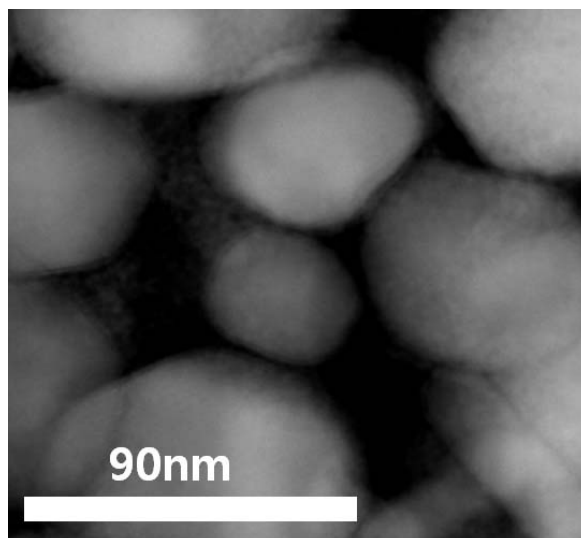

**Fig. S3.** TEM image for the EDS mapping analysis of **Fig. 1d** and **1e**, which shows the non-existence of the core-shell or bimetallic structures

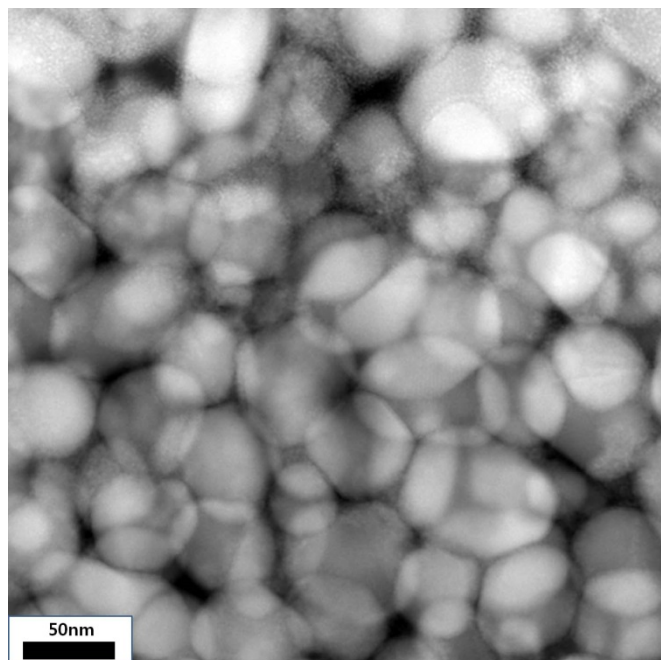

**Fig. S4.** White field cross-section TEM image of the pressed  $\text{Cu}_3\text{Sn}$  nanoparticle electrode at 131.3 MPa pressure condition

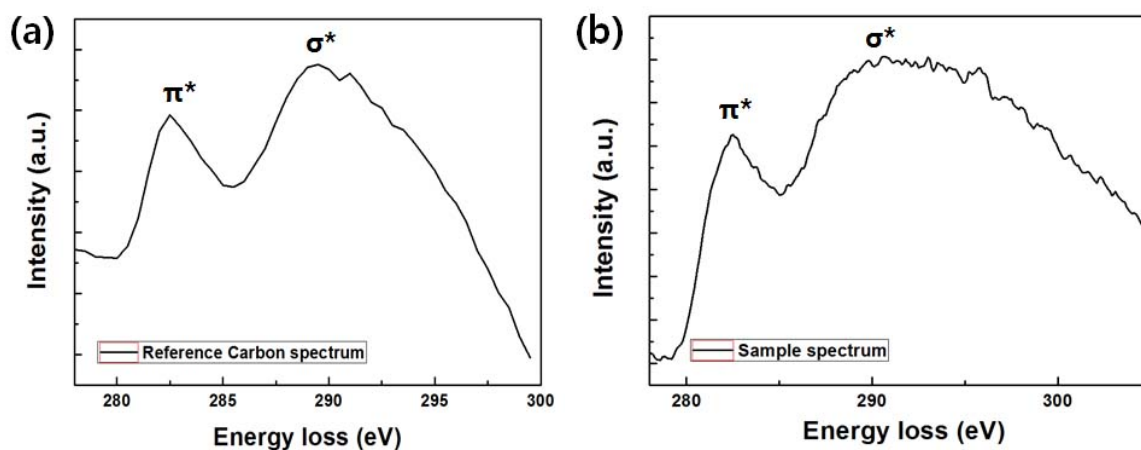

**Fig. S5.** A typical EELS spectrum (a) carbon reference, (b) carbon spectrum of the pressed Cu<sub>3</sub>Sn alloy nanoparticles, corresponding TEM-EELS elemental map (Fig. 3e)

**Table S2.** Resistivity of pressed Cu<sub>3</sub>Sn nanoparticles layer fabricated at various pressures from 39.4 MPa to 170.7 MPa

| Pressure [MPa]                       | 39.4                   | 65.6                   | 91.9                   | 131.3                  | 170.7                  |
|--------------------------------------|------------------------|------------------------|------------------------|------------------------|------------------------|
| Average [ $\Omega \cdot \text{cm}$ ] | $2.504 \times 10^{-7}$ | $2.257 \times 10^{-7}$ | $2.125 \times 10^{-7}$ | $1.986 \times 10^{-7}$ | $2.055 \times 10^{-7}$ |

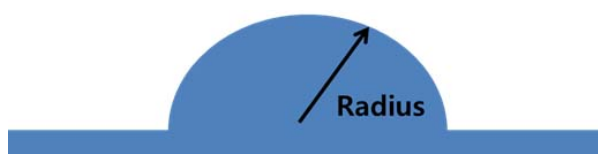

**Fig. S6.** Schematic showing of mechanical bending test condition

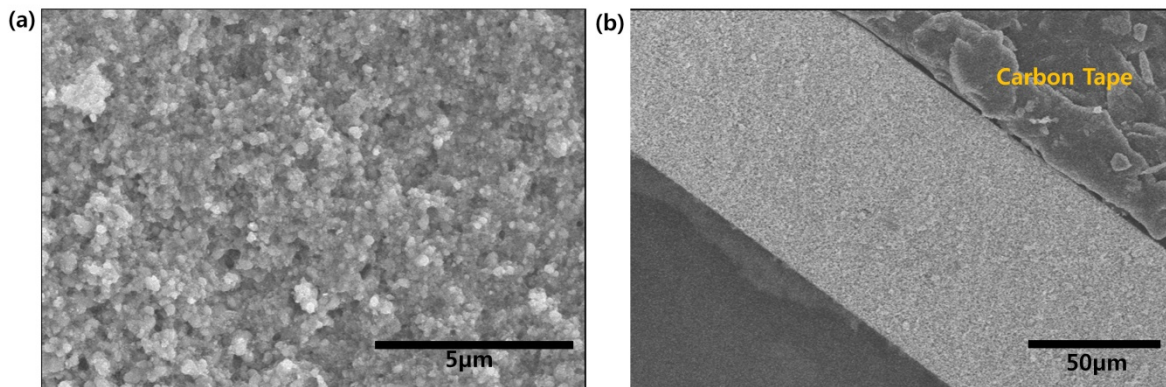

**Fig. S7.** (a) Plane view SEM and (b) cross section SEM images of the pressed Cu<sub>3</sub>Sn nanoparticles. The thickness of the pressed Cu<sub>3</sub>Sn nanoparticles electrode is ~ 89 μm in 65.6 MPa.

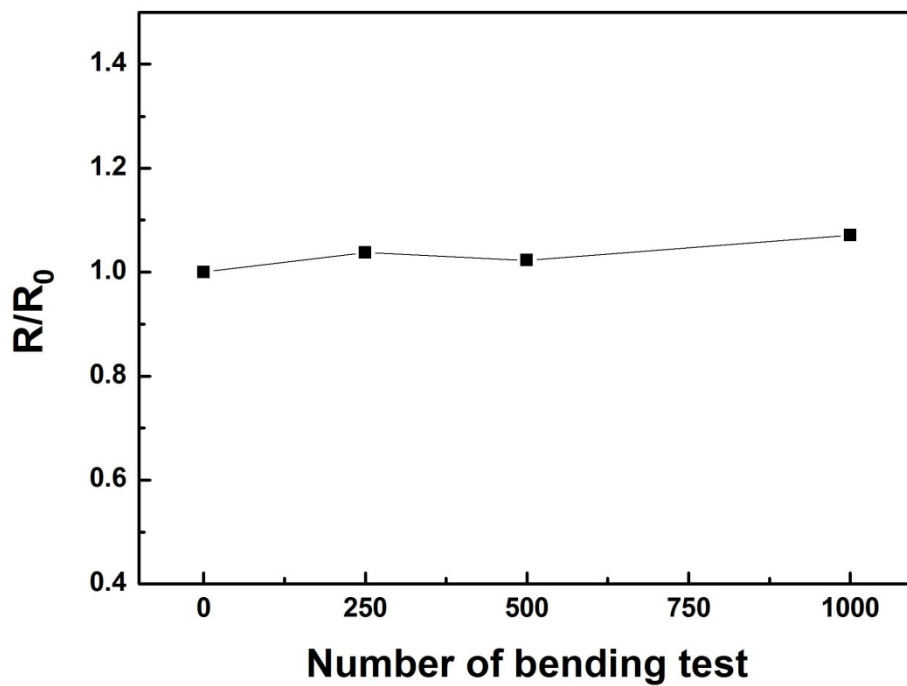

**Fig. S8.** Change of the resistivity during the bending test for the pressed Cu<sub>3</sub>Sn alloy nanoparticles layer.



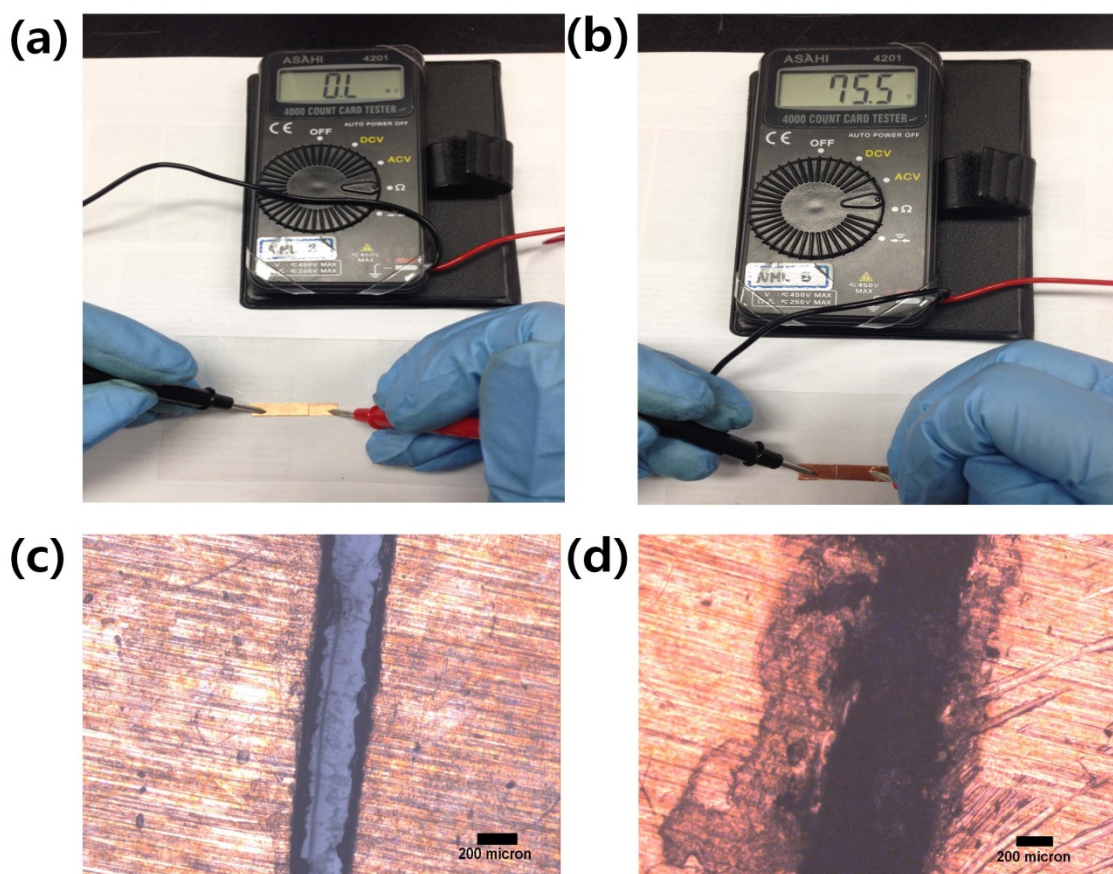

**Fig. S9.** (a) Optical images of the disconnected copper electrode wire and (b) well connected electrode wire (c) Optical microscopy images of disconnected electrode wire and (d) well connected electrode wire by pressed  $\text{Cu}_3\text{Sn}$  nanoparticles layer

**Table S3.** Resistivity variation of the pressed  $\text{Cu}_3\text{Sn}$  nanoparticle electrode under ambient air conditions for 4 weeks

| Time [week]                        | 1                      | 2                      | 3                      | 4                      |
|------------------------------------|------------------------|------------------------|------------------------|------------------------|
| Average [ $\Omega\cdot\text{cm}$ ] | $1.986 \times 10^{-7}$ | $2.042 \times 10^{-7}$ | $2.103 \times 10^{-7}$ | $2.013 \times 10^{-7}$ |

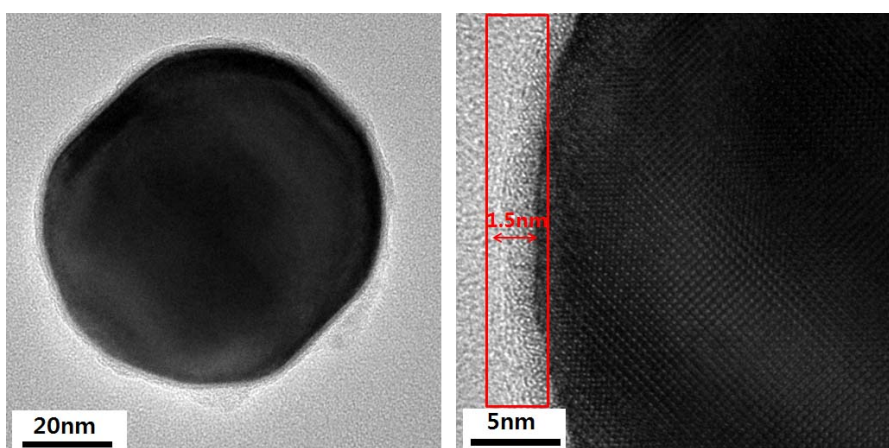

**Fig. S10.** HR-TEM image of  $\text{Cu}_3\text{Sn}$  alloy nanoparticles and the red line indicate the oxide layer and the oxide layer thickness is measured to 1.5nm

**(a) Just Synthesized**

| Element       | Wt%    | Atomic % |
|---------------|--------|----------|
| O             | 2.80   | 11.91    |
| Cu            | 65.37  | 69.88    |
| Sn            | 31.83  | 18.22    |
| <b>Total:</b> | 100.00 | 100.00   |

**(b) After 4week**

| Element       | Wt%    | Atomic % |
|---------------|--------|----------|
| O             | 2.82   | 12.27    |
| Cu            | 60.30  | 66.09    |
| Sn            | 36.88  | 21.64    |
| <b>Total:</b> | 100.00 | 100.00   |

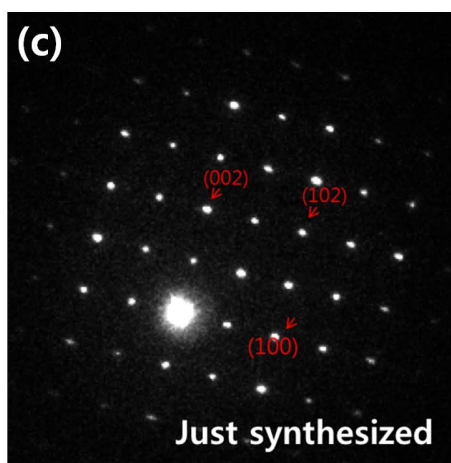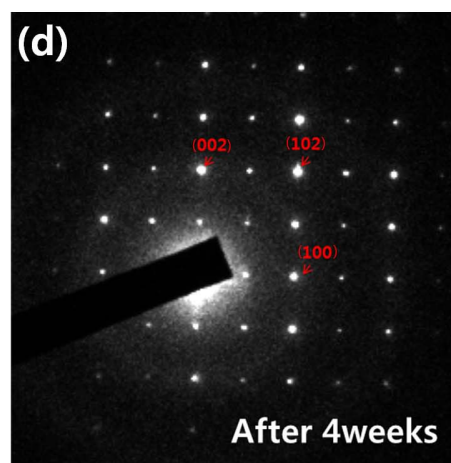

**Fig. S11.** EDS analysis of (a) just synthesized  $\text{Cu}_3\text{Sn}$  alloy nanoparticles and (b) stored in ambient air condition (RH 50%, 25 °C) for 4 weeks. The SAED pattern analysis of the  $\text{Cu}_3\text{Sn}$  alloy nanoparticles compared with the stored time in (c) just synthesized nanoparticles and (d) stored in ambient air condition (RH 50%, 25 °C) for 4 weeks
